# Supplementary material for: Selection of an Anticalin ® against the membrane form of Hsp70 via bacterial surface display and its theranostic application in tumour models
Source: publisher site journal article supplement (doi:10.1515/hsz-2017-0207), 2017-11-15
Supplement: Supplementary file 1 [file hsz-2017-0207_suppl.docx]

**Selection of an Anticalin® against the membrane form of Hsp70 via bacterial surface display and its theranostic application in tumour models**

Lars Friedrich, Petra Kornberger, Claudia T. Mendler, Gabriele Multhoff, Markus Schwaiger and Arne Skerra

**Supplementary material**

Figures S1-S7

**Figure S1**  Triage criteria for the selection of Hsp70.1 Anticalins from a naïve Lcn2 library with 20 randomised positions followed by affinity maturation. For details see the main text as well as Figure 1 and Table 1.


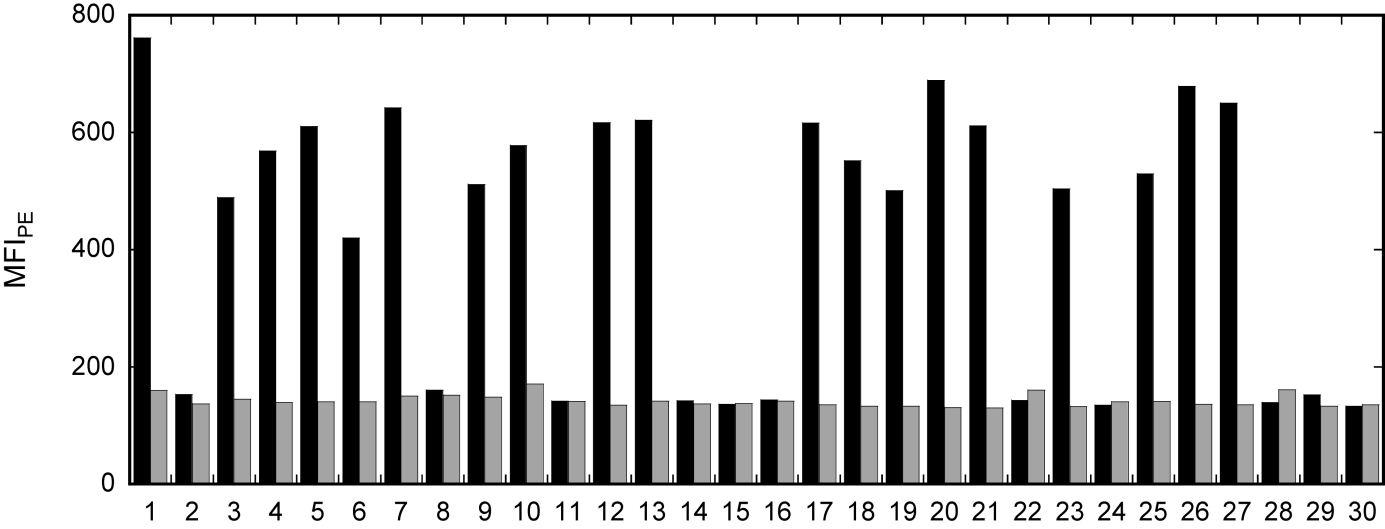


**Figure S2**  FACS screening of single clones for SBDHsp70 binding. Cultures of 30 clones obtained after the selection from an *E. coli*-displayed Lcn2 library were incubated with biotinylated SBDHsp70. Subsequently, the cells were stained with streptavidin/phycoerythrin and the mean fluorescence intensities were determined (black bars). For negative control, the cells were incubated in buffer without SBDHsp70 (gray bars).


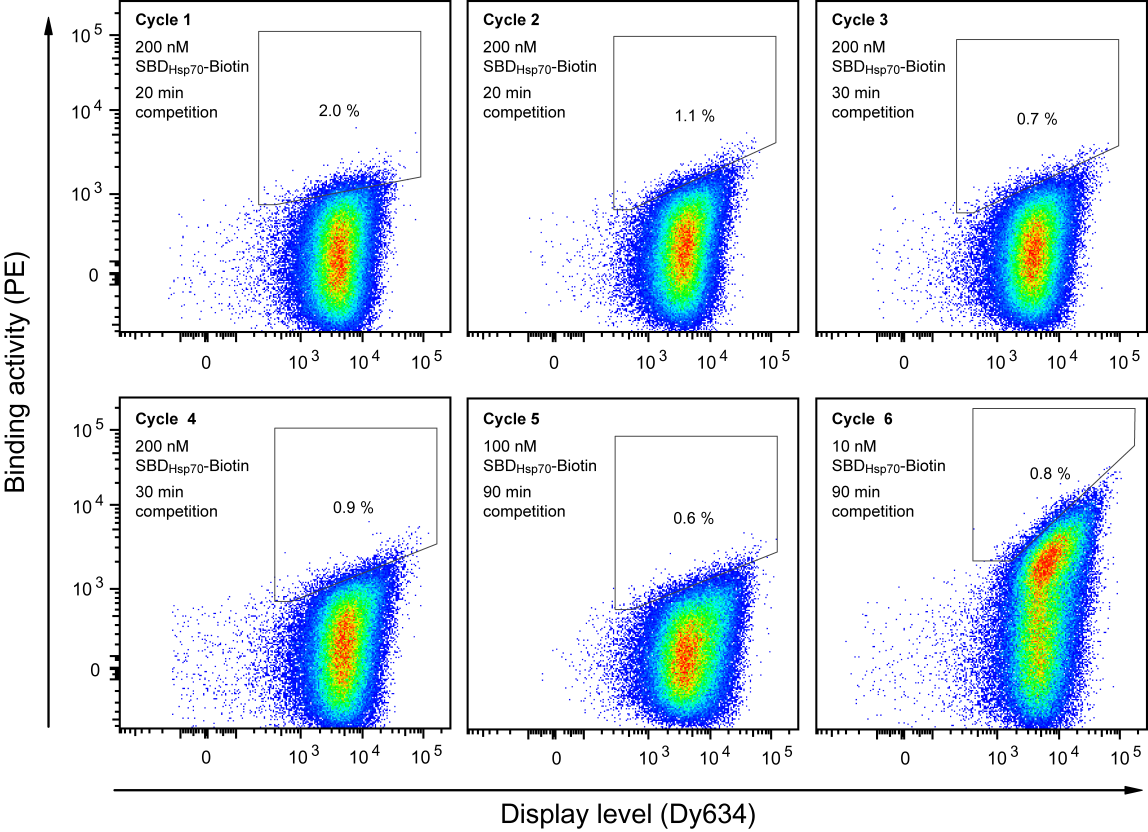

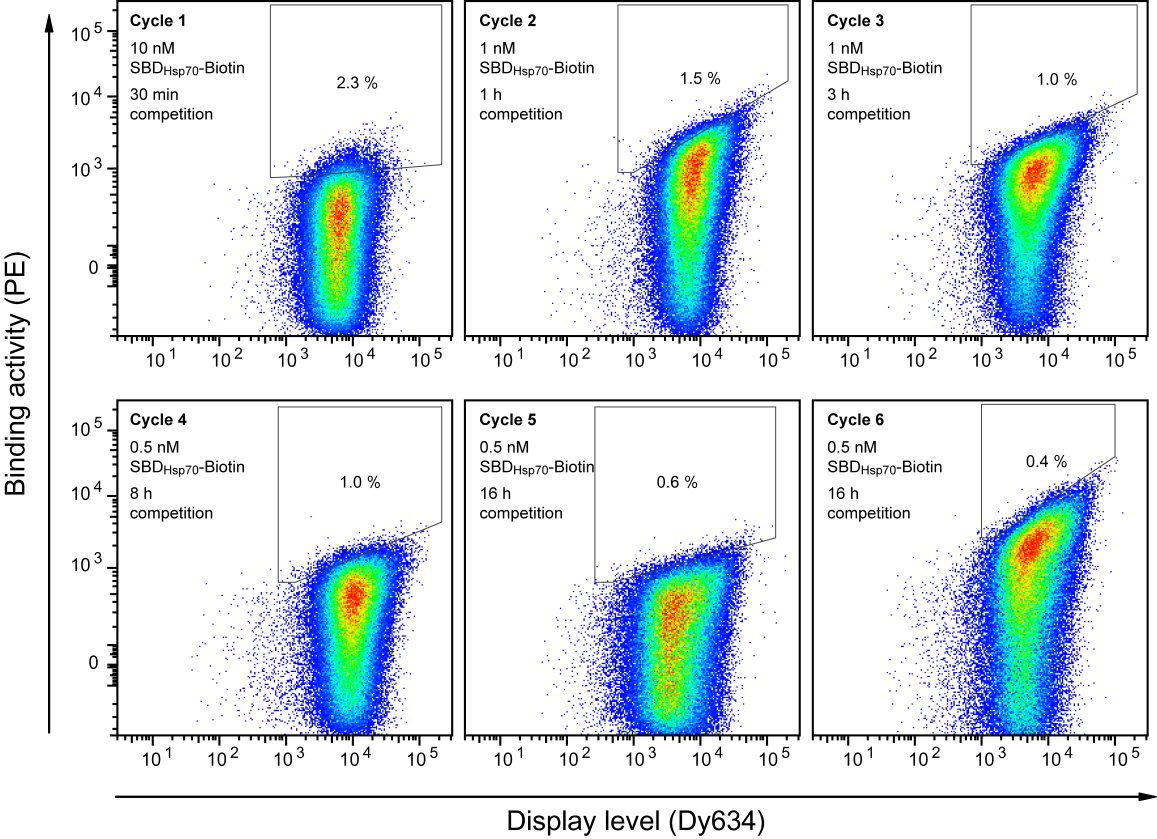


A

B

**Figure S3**  Affinity maturation of the Hsp70-binding Anticalin BBG10. A random mutagenesis library based on BBG10 was displayed on the surface of *E. coli*. FACS was performed either without (A) or with (B) a preceding selection step using paramagnetic particles. In order to enrich variants with slower off-rates, the biotinylated SBDHsp70 was allowed to dissociate for the indicated period of time while rebinding was prevented by competition with an excess of the unlabelled target protein. For additional selection pressure on the association rate, the target concentration was decreased in the course of selection as stated.


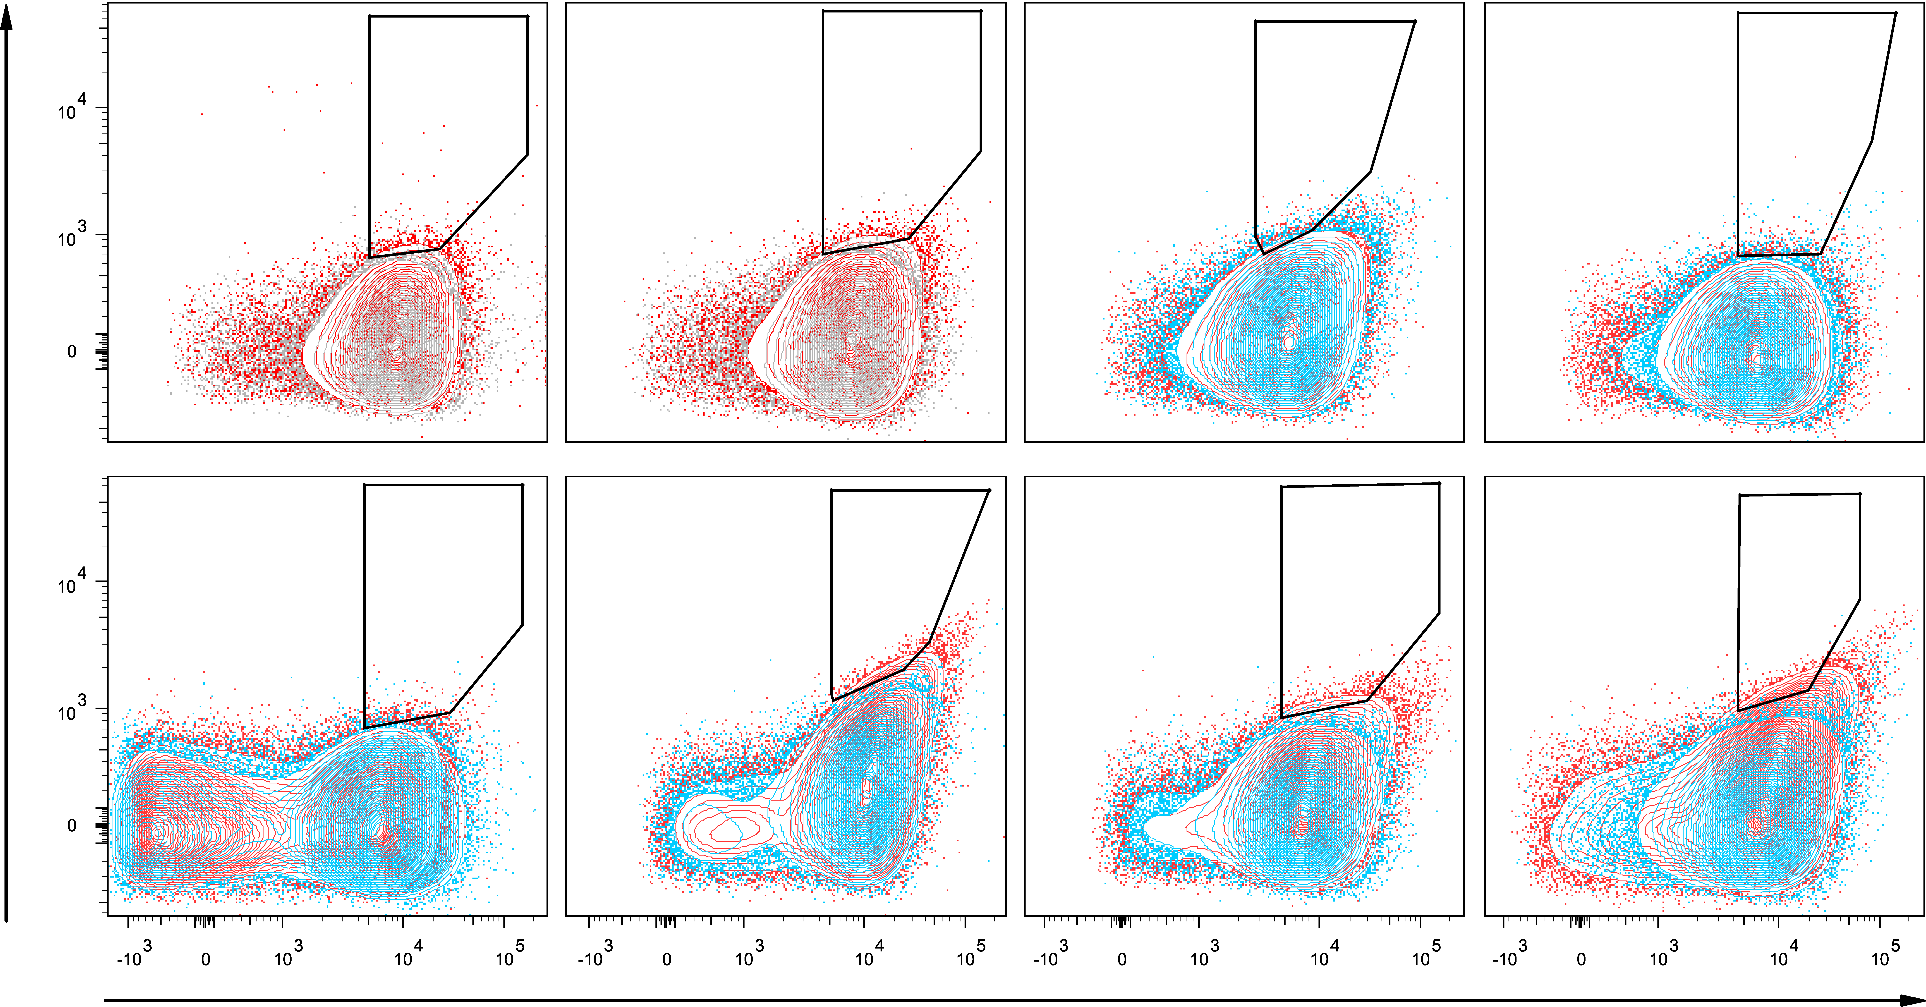


Cycle 1

Cycle 2

Cycle 3

Cycle 4

Cycle 5

Cycle 6

Cycle 7

Cycle 8

0.42 %

(0.07 %)

0.52 %

(0.11 %)

0.27 %

(0.23 %)

0.25 %

(0.21 %)

0.25 %

(0.11 %)

0.41 %

(0.02 %)

0.52 %

(0.03 %)

0.85 %

(0.02 %)

0,5 nM

rhSBDHsp70-Biotin

17 h

competition

0,5 nM

rhSBDHsp70-Biotin

17 h

competition

0,5 nM

rhSBDHsp70-Biotin

17 h

competition

0,5 nM

rhSBDHsp70-Biotin

19 h

competition

0,5 nM

rhSBDHsp70-Biotin

18 h

competition

1 nM

rhSBDHsp70-Biotin

17 h

competition

0,5 nM

rhSBDHsp70-Biotin

19 h

competition

0,5 nM

rhSBDHsp70-Biotin

19 h

competition

Display level (DY634 fluorescence)

Binding activity (PE fluorescence)

**Figure S4**  Affinity maturation of Hsp70 Anticalin BBG10I by directed evolution. A random library was generated by doped mutagenesis of the best variant from the first affinity maturation, BBG10I, and displayed on the surface of *E. coli* cells. In order to enrich variants with slower off rates, the biotinylated SBDHsp70 was allowed to dissociate for the indicated period of time. Rebinding was prevented by competition with an excess of unlabelled target protein. Graphs show overlayed 2D contour plots of the Anticalin library analysed with the biotinylated target (red) *versus* buffer (grey, cycles 1 and 2) or the original variant BBG10I (blue, cycles 3 to 8). The polygonal sorting gates show the percentage of sorted cells (numbers in brackets indicate the corresponding percentage of the buffer/BBG10I control).


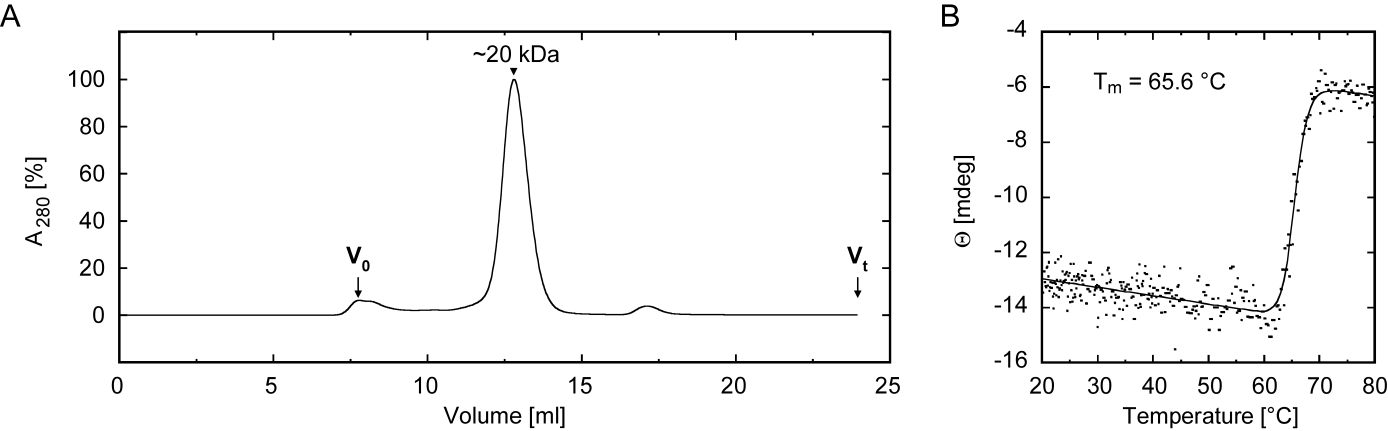


**A**

**B**

**Figure S5**  Properties of the Anticalin BBG10C/I obtained from affinity maturation. (**A**) The Anticalin elutes in a single peak from SEC with an elution volume corresponding to the expected molecular mass of the monomer (22 kDa). (**B**) Thermal unfolding was analyzed by CD spectroscopy at a wavelength of 210 nm. Data were fitted according to an equation for a two-state transition and a melting temperature Tm = 65.6 °C was calculated.

rmHsp70.3

rhGrp78 (SBD)

rhHsp70 (SBD)

**Figure S6** SPR affinity analysis of BBG10C/I with different target proteins. The Anticalin was immobilized on a carboxymethyl dextran sensorchip and the recombinant SBD of human Hsp70.1 or Grp78, or recombinant full length murine Hsp70.3, was injected in a concentration series. The measured data were fitted to a 1:1 Langmuir binding model (for the resulting kinetic parameters see Table 2 of the main text).

**Number of cells [%]**

**Number of cells [%]**

**FITC fluorescence**

**FITC fluorescence**

**A**

**B**

**Figure S7**  Flow cytofluorimetric characterization of surface Hsp70 expression on (**A**) FaDu and (**B**) OPM-2 cells. Cells were incubated either with the fluorescein-conjugated monoclonal antibody cmHsp70.1 (red lines) or a similarly labelled IgG isotype-matched control antibody (black lines). The staining procedure was performed at 4 °C and only propidium iodide-negative, viable cells were gated and analysed. As result, while surface Hsp70 expression was overt on FaDu cells, the OPM-2 cells were completely negative.
